# Supplementary material for: Nucleoredoxin Downregulation Reduces β-Catenin Levels and Shifts Hematopoietic Differentiation towards Myeloid Lineage In Vitro
Source: MDPI journal article supplement (doi:10.3390/biochem1010003), 2021-04-04
Supplement: s1 [file s1]

# **Nucleoredoxin Downregulation Reduces $\beta$ -Catenin Levels and Shifts Hematopoietic Differentiation towards Myeloid Lineage In Vitro**

Alejandro Pérez-Fernández <sup>1,2</sup>, Carla Ijurko <sup>1,2</sup>, Guillermo López-Ruano <sup>1,2</sup>,  
Rodrigo Prieto-Bermejo <sup>1,2</sup>, Carmen Sánchez-Bernal <sup>1,2</sup>, Jesús Sánchez-Yagüe <sup>1,2</sup>  
and Ángel Hernández-Hernández <sup>1,2,\*</sup>

**Supplementary Figures**

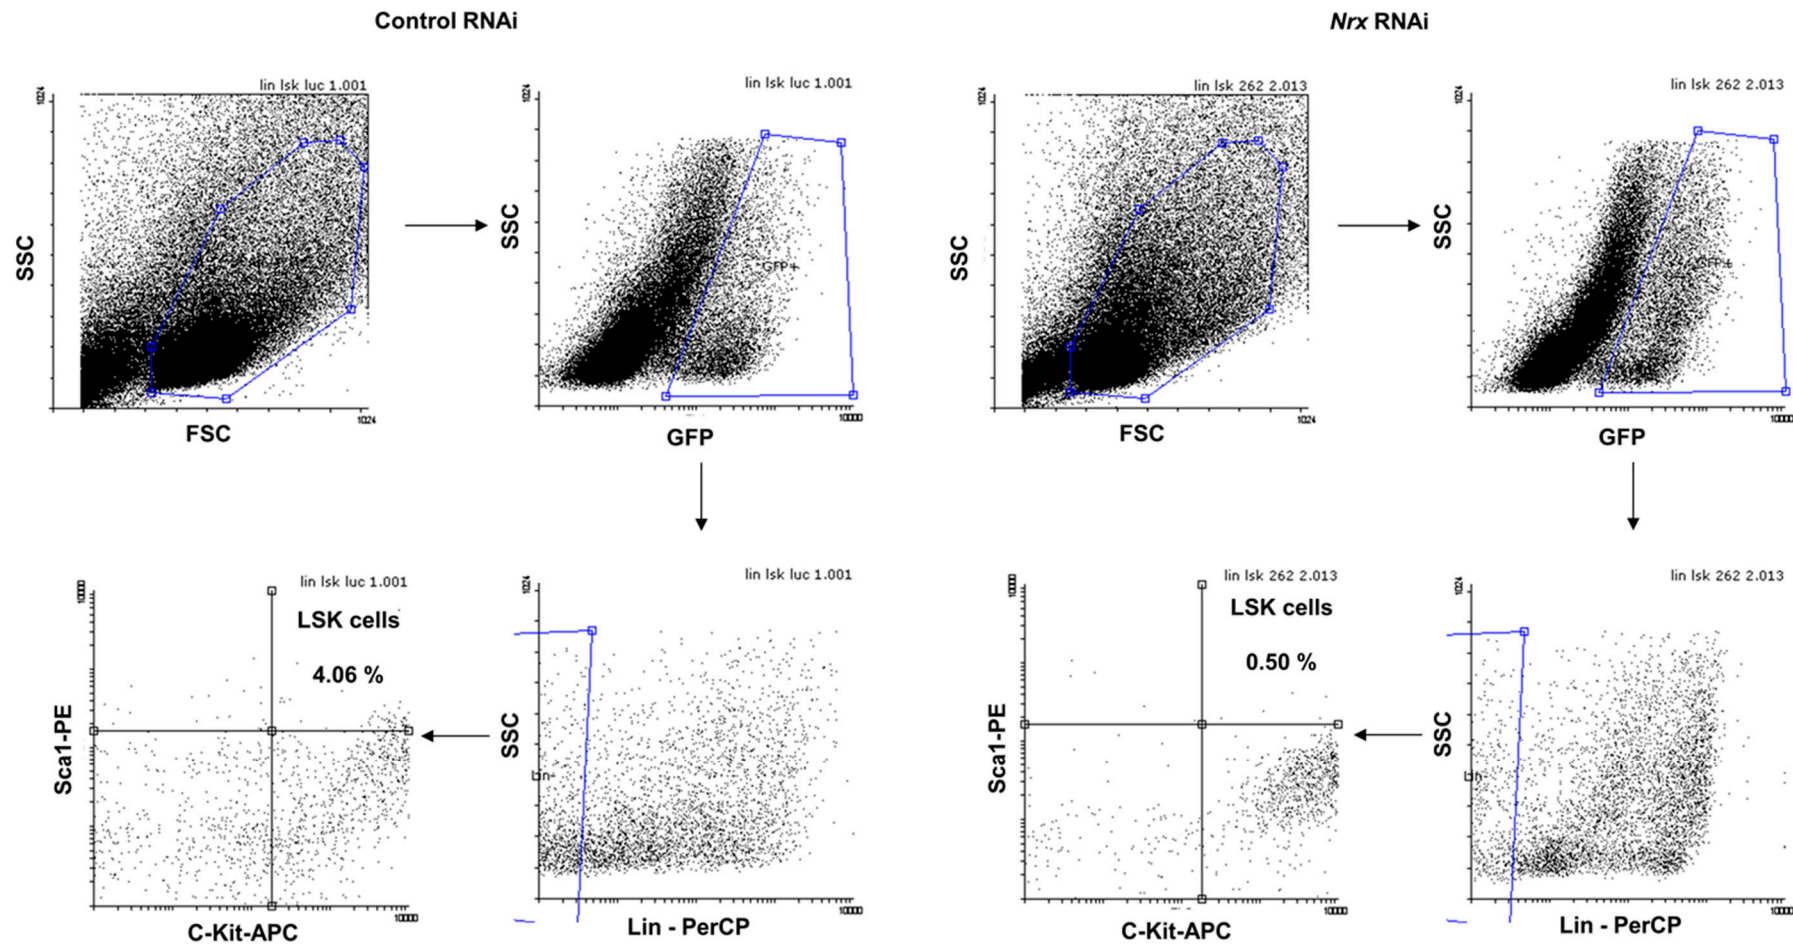

**Figure 1. Gating strategy for *Lin*<sup>-</sup> and LSK cells.** Alive cells were gated on the basis of FSC/SSC signal. Within the alive cells population, lentivirally transduced cells were gated through GFP fluorescence. Finally, from alive GFP<sup>+</sup> cells, *Lin*<sup>-</sup> were negatively selected through Lineage Cell cocktail antibody fluorescence, and finally LSK cells were the Sca1<sup>+</sup>C-Kit<sup>+</sup> cells from the gated *Lin*<sup>-</sup> cells.

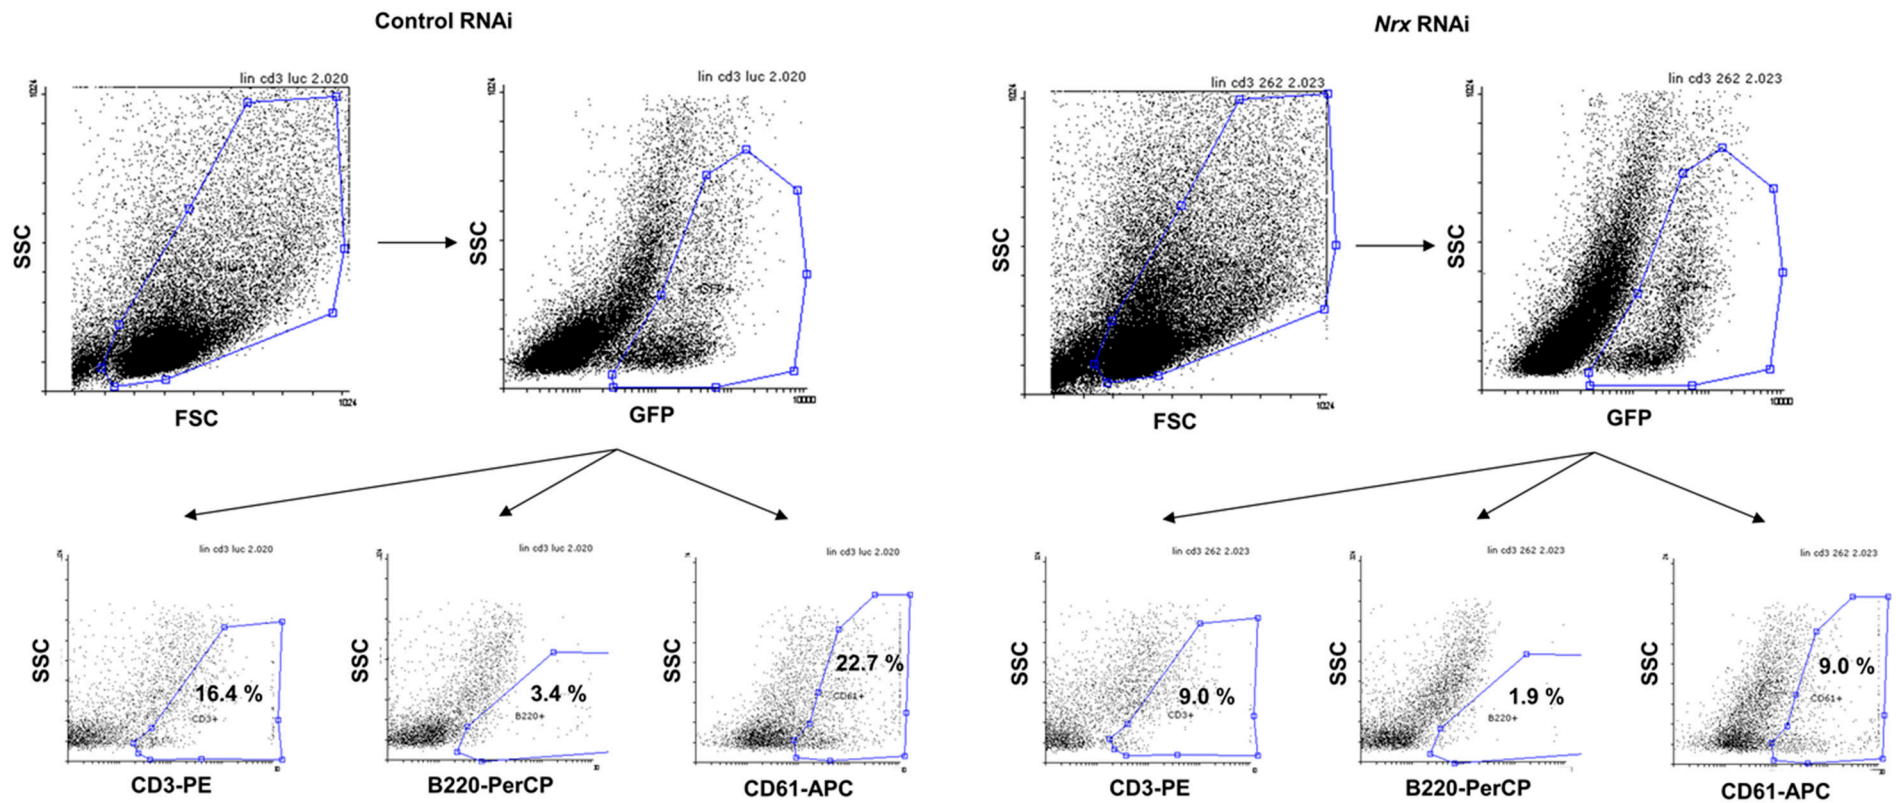

**Figure S2. Gating strategy for lymphoid and megakaryocytic Surface markers.** Alive cells were gated on the basis of FSC/SSC signal. Within the alive cells population, lentivirally transduced cells were gated through GFP fluorescence. Finally, from alive GFP<sup>+</sup> cells, CD3<sup>+</sup>, B220<sup>+</sup> and CD61<sup>+</sup> populations were selected on the basis of positive staining with the indicated antibodies.

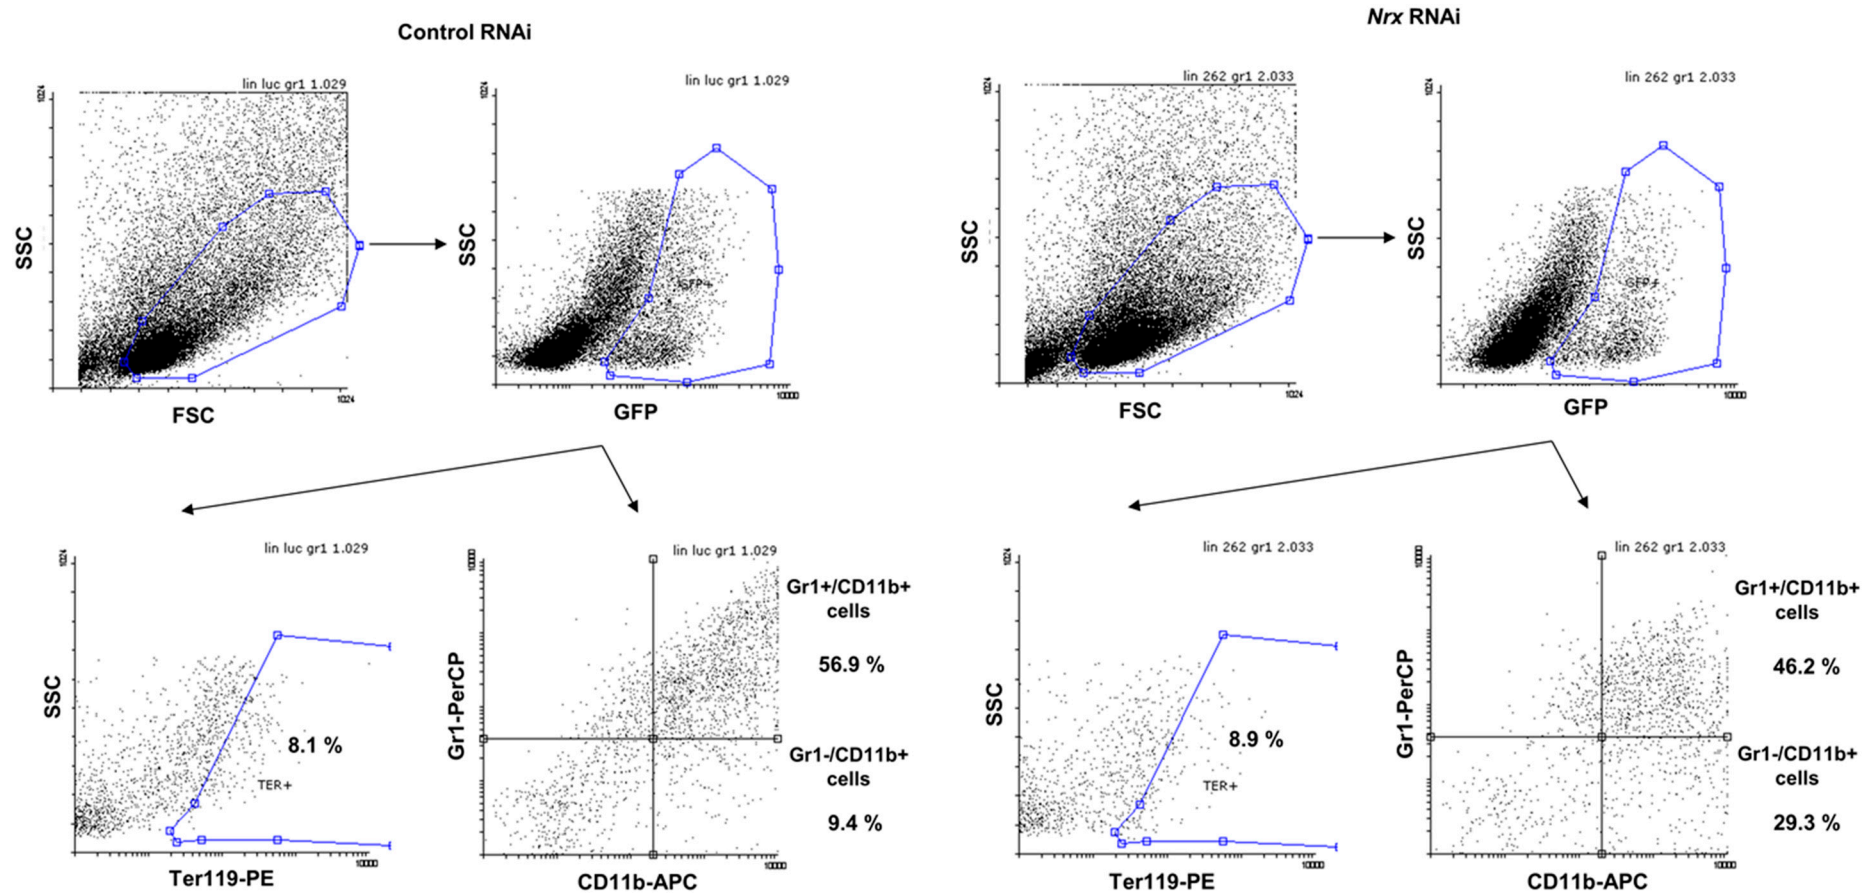

**Figure S3. Gating strategy for erythroid and myeloid surface markers.** Alive cells were gated on the basis of FSC/SSC signal. Within the alive cells population, lentivirally transduced cells were gated through GFP fluorescence. Finally, from alive GFP<sup>+</sup> cells, Ter119<sup>+</sup>, CD11b<sup>+</sup>Gr-1<sup>-</sup> and CD11b<sup>+</sup>Gr-1<sup>+</sup> populations were selected on the basis of double staining with the indicated antibodies.
